# Supplementary material for: Towards an accurate description of perovskite ferroelectrics: exchange and correlation effects
Source: PubMed Central journal article supplement (PMC5335310; doi:10.1038/srep43482), 2017-03-03
Supplement: srep43482-s1.pdf [file srep43482-s1.pdf]

# **Towards an accurate description of perovskite ferroelectrics: exchange and correlation effects**

Simuck F. Yuk,<sup>1</sup> Krishna Chaitanya Pitike,<sup>2</sup> Serge M. Nakhmanson,<sup>2</sup> Markus Eisenbach,<sup>3</sup>  
Ying Wai Li,<sup>3</sup> and Valentino R. Cooper<sup>1,\*</sup>

<sup>1</sup>*Materials Science and Technology Division, Oak Ridge National Laboratory, Oak Ridge, TN  
37831, USA*

<sup>2</sup>*Department of Materials Science & Engineering, and Institute of Materials Science,  
University of Connecticut, Storrs, Connecticut 06269, USA*

<sup>3</sup>*National Center for Computational Sciences, Oak Ridge National Laboratory, Oak Ridge,  
TN 37831, USA*

## Supplementary Information

The detailed structural information on each crystal phase of  $\text{PbTiO}_3$ ,  $\text{BaTiO}_3$ , and  $\text{KNbO}_3$  is summarized in Table S1, using LDA, PBE, PBEsol, and vdW-DF-C09 exchange-correlation functionals.

**Table S1.** Structural information (Wyckoff positions of atoms in fractional coordinates with respect to unit cells) of different crystal phases of  $\text{PbTiO}_3$ ,  $\text{BaTiO}_3$ , and  $\text{KNbO}_3$ , using LDA, PBE, PBEsol, and vdW-DF-C09.

| <b>Cubic Phase (Pm-3m)</b>                                 |                                            |                                            |                                            |                                            |                                            |
|------------------------------------------------------------|--------------------------------------------|--------------------------------------------|--------------------------------------------|--------------------------------------------|--------------------------------------------|
| <b><i>PbTiO</i><sub>3</sub>:</b>                           |                                            |                                            |                                            |                                            |                                            |
|                                                            | <b>LDA</b>                                 | <b>PBE</b>                                 | <b>PBEsol</b>                              | <b>vdW-DF-C09</b>                          | <b>Experiment<sup>1</sup></b>              |
| <i>a</i> (Å)                                               | 3.881                                      | 3.966                                      | 3.919                                      | 3.921                                      | 3.930                                      |
| <b><i>BaTiO</i><sub>3</sub>:</b>                           |                                            |                                            |                                            |                                            |                                            |
|                                                            | <b>LDA</b>                                 | <b>PBE</b>                                 | <b>PBEsol</b>                              | <b>vdW-DF-C09</b>                          | <b>Experiment<sup>2</sup></b>              |
| <i>a</i> (Å)                                               | 3.941                                      | 4.026                                      | 3.977                                      | 3.981                                      | 4.000                                      |
| <b><i>KNbO</i><sub>3</sub>:</b>                            |                                            |                                            |                                            |                                            |                                            |
|                                                            | <b>LDA</b>                                 | <b>PBE</b>                                 | <b>PBEsol</b>                              | <b>vdW-DF-C09</b>                          | <b>Experiment<sup>3</sup></b>              |
| <i>a</i> (Å)                                               | 3.952                                      | 4.025                                      | 3.986                                      | 3.988                                      | 4.005                                      |
| <b>Tetragonal Phase (P4mm)</b>                             |                                            |                                            |                                            |                                            |                                            |
| <b><i>PbTiO</i><sub>3</sub>:</b>                           |                                            |                                            |                                            |                                            |                                            |
|                                                            | <b>LDA</b>                                 | <b>PBE</b>                                 | <b>PBEsol</b>                              | <b>vdW-DF-C09</b>                          | <b>Experiment<sup>4</sup></b>              |
| <i>a</i> (Å)                                               | 3.858                                      | 3.837                                      | 3.865                                      | 3.895                                      | 3.904                                      |
| <i>c</i> (Å)                                               | 4.017                                      | 4.787                                      | 4.228                                      | 4.076                                      | 4.152                                      |
| <b>Atom</b>                                                | <b><math>\Delta z_{\text{atom}}</math></b> | <b><math>\Delta z_{\text{atom}}</math></b> | <b><math>\Delta z_{\text{atom}}</math></b> | <b><math>\Delta z_{\text{atom}}</math></b> | <b><math>\Delta z_{\text{atom}}</math></b> |
| Pb: 1a (0, 0, 0)                                           | ---                                        | ---                                        | ---                                        | ---                                        | ---                                        |
| Ti: 1b (0.5, 0.5, 0.5+ $\Delta z_{\text{Ti}}$ )            | 0.033                                      | 0.056                                      | 0.040                                      | 0.031                                      | 0.0400                                     |
| O <sub>1</sub> : 1b (0.5, 0.5, $\Delta z_{\text{O1}}$ )    | 0.088                                      | 0.195                                      | 0.122                                      | 0.090                                      | 0.1120                                     |
| O <sub>2</sub> : 2c (0, 0.5, 0.5+ $\Delta z_{\text{O2}}$ ) | 0.100                                      | 0.171                                      | 0.126                                      | 0.100                                      | 0.1120                                     |
| <b><i>BaTiO</i><sub>3</sub>:</b>                           |                                            |                                            |                                            |                                            |                                            |
|                                                            | <b>LDA</b>                                 | <b>PBE</b>                                 | <b>PBEsol</b>                              | <b>vdW-DF-C09</b>                          | <b>Experiment<sup>5</sup></b>              |
| <i>a</i> (Å)                                               | 3.933                                      | 3.991                                      | 3.962                                      | 3.969                                      | 3.992                                      |
| <i>c</i> (Å)                                               | 3.980                                      | 4.216                                      | 4.059                                      | 4.039                                      | 4.036                                      |
| <b>Atom</b>                                                | <b><math>\Delta z_{\text{atom}}</math></b> | <b><math>\Delta z_{\text{atom}}</math></b> | <b><math>\Delta z_{\text{atom}}</math></b> | <b><math>\Delta z_{\text{atom}}</math></b> | <b><math>\Delta z_{\text{atom}}</math></b> |
| Ba: 1a (0, 0, 0)                                           | ---                                        | ---                                        | ---                                        | ---                                        | ---                                        |
| Ti: 1b (0.5, 0.5, 0.5+ $\Delta z_{\text{Ti}}$ )            | 0.013                                      | 0.018                                      | 0.016                                      | 0.016                                      | 0.0203                                     |
| O <sub>1</sub> : 1b (0.5, 0.5, $\Delta z_{\text{O1}}$ )    | -0.021                                     | -0.052                                     | -0.031                                     | -0.025                                     | -0.0259                                    |
| O <sub>2</sub> : 2c (0, 0.5, 0.5+ $\Delta z_{\text{O2}}$ ) | -0.013                                     | -0.03                                      | -0.019                                     | -0.015                                     | -0.0123                                    |
| <b><i>KNbO</i><sub>3</sub>:</b>                            |                                            |                                            |                                            |                                            |                                            |
|                                                            | <b>LDA</b>                                 | <b>PBE</b>                                 | <b>PBEsol</b>                              | <b>vdW-DF-C09</b>                          | <b>Experiment<sup>3</sup></b>              |
| <i>a</i> (Å)                                               | 3.944                                      | 3.994                                      | 3.969                                      | 3.975                                      | 3.997                                      |
| <i>c</i> (Å)                                               | 3.984                                      | 4.205                                      | 4.061                                      | 4.048                                      | 4.063                                      |
| <b>Atom</b>                                                | <b><math>\Delta z_{\text{atom}}</math></b> | <b><math>\Delta z_{\text{atom}}</math></b> | <b><math>\Delta z_{\text{atom}}</math></b> | <b><math>\Delta z_{\text{atom}}</math></b> | <b><math>\Delta z_{\text{atom}}</math></b> |
| K: 1a (0, 0, 0)                                            | ---                                        | ---                                        | ---                                        | ---                                        | ---                                        |
| Nb: 1b (0.5, 0.5, 0.5+ $\Delta z_{\text{Nb}}$ )            | 0.010                                      | 0.018                                      | 0.015                                      | 0.015                                      | 0.0230                                     |
| O <sub>1</sub> : 1b (0.5, 0.5, $\Delta z_{\text{O1}}$ )    | -0.017                                     | -0.045                                     | -0.027                                     | -0.022                                     | -0.0170                                    |
| O <sub>2</sub> : 2c (0, 0.5, 0.5+ $\Delta z_{\text{O2}}$ ) | -0.018                                     | -0.033                                     | -0.024                                     | -0.021                                     | -0.0190                                    |

### Orthorhombic Phase (Amm2)

| <b>BaTiO<sub>3</sub>:</b>                                                                 |                          |                          |                          |                          |                          |                          |                          |                          |                          |                          |  |
|-------------------------------------------------------------------------------------------|--------------------------|--------------------------|--------------------------|--------------------------|--------------------------|--------------------------|--------------------------|--------------------------|--------------------------|--------------------------|--|
|                                                                                           | LDA                      | PBE                      | PBEsol                   | vdW-DF-C09               | Experiment <sup>6</sup>  |                          |                          |                          |                          |                          |  |
| <i>a</i> (Å)                                                                              | 3.931                    | 3.977                    | 3.956                    | 3.964                    | 3.990                    |                          |                          |                          |                          |                          |  |
| <i>b</i> (Å)                                                                              | 5.599                    | 5.796                    | 5.675                    | 5.665                    | 5.669                    |                          |                          |                          |                          |                          |  |
| <i>c</i> (Å)                                                                              | 5.609                    | 5.848                    | 5.696                    | 5.681                    | 5.682                    |                          |                          |                          |                          |                          |  |
| Atom                                                                                      | $\Delta y_{\text{atom}}$ | $\Delta z_{\text{atom}}$ | $\Delta y_{\text{atom}}$ | $\Delta z_{\text{atom}}$ | $\Delta y_{\text{atom}}$ | $\Delta z_{\text{atom}}$ | $\Delta y_{\text{atom}}$ | $\Delta z_{\text{atom}}$ | $\Delta y_{\text{atom}}$ | $\Delta z_{\text{atom}}$ |  |
| Ba: 2a (0, 0, 0)                                                                          | ---                      | ---                      | ---                      | ---                      | ---                      | ---                      | ---                      | ---                      | ---                      | ---                      |  |
| Ti: 2b (0.5, 0, 0.5+ $\Delta z_{\text{Ti}}$ )                                             | ---                      | 0.011                    | ---                      | 0.017                    | ---                      | 0.014                    | ---                      | 0.013                    | ---                      | 0.010                    |  |
| O <sub>I</sub> : 2a (0, 0, 0.5+ $\Delta z_{\text{O}_I}$ )                                 | ---                      | -0.011                   | ---                      | -0.023                   | ---                      | -0.016                   | ---                      | -0.013                   | ---                      | -0.010                   |  |
| O <sub>2</sub> : 4e (0.5, 0.25- $\Delta y_{\text{O}_1}$ , 0.75+ $\Delta z_{\text{O}_2}$ ) | 0.003                    | -0.013                   | 0.009                    | -0.026                   | 0.005                    | -0.018                   | 0.004                    | -0.015                   | 0.003                    | -0.013                   |  |
| <b>KNbO<sub>3</sub>:</b>                                                                  |                          |                          |                          |                          |                          |                          |                          |                          |                          |                          |  |
|                                                                                           | LDA                      | PBE                      | PBEsol                   | vdW-DF-C09               | Experiment <sup>3</sup>  |                          |                          |                          |                          |                          |  |
| <i>a</i> (Å)                                                                              | 3.941                    | 3.984                    | 3.963                    | 3.970                    | 3.973                    |                          |                          |                          |                          |                          |  |
| <i>b</i> (Å)                                                                              | 5.610                    | 5.788                    | 5.682                    | 5.677                    | 5.695                    |                          |                          |                          |                          |                          |  |
| <i>c</i> (Å)                                                                              | 5.616                    | 5.822                    | 5.699                    | 5.691                    | 5.721                    |                          |                          |                          |                          |                          |  |
| Atom                                                                                      | $\Delta y_{\text{atom}}$ | $\Delta z_{\text{atom}}$ | $\Delta y_{\text{atom}}$ | $\Delta z_{\text{atom}}$ | $\Delta y_{\text{atom}}$ | $\Delta z_{\text{atom}}$ | $\Delta y_{\text{atom}}$ | $\Delta z_{\text{atom}}$ | $\Delta y_{\text{atom}}$ | $\Delta z_{\text{atom}}$ |  |
| K: 2a (0, 0, 0)                                                                           | ---                      | ---                      | ---                      | ---                      | ---                      | ---                      | ---                      | ---                      | ---                      | ---                      |  |
| Nb: 2b (0.5, 0, 0.5+ $\Delta z_{\text{Nb}}$ )                                             | ---                      | -0.008                   | ---                      | -0.016                   | ---                      | -0.012                   | ---                      | -0.012                   | ---                      | -0.017                   |  |
| O <sub>I</sub> : 2a (0, 0, 0.5+ $\Delta z_{\text{O}_I}$ )                                 | ---                      | 0.016                    | ---                      | 0.026                    | ---                      | 0.020                    | ---                      | 0.018                    | ---                      | 0.004                    |  |
| O <sub>2</sub> : 4e (0.5, 0.25- $\Delta y_{\text{O}_1}$ , 0.75+ $\Delta z_{\text{O}_2}$ ) | 0                        | 0.013                    | -0.006                   | 0.024                    | -0.002                   | 0.018                    | -0.001                   | 0.016                    | -0.013                   | 0.018                    |  |

### Rhombohedral Phase (R3m)

| <b>BaTiO<sub>3</sub>:</b>                                                                                       |                          |                          |                          |                          |                          |                          |                          |                          |                          |                          |  |
|-----------------------------------------------------------------------------------------------------------------|--------------------------|--------------------------|--------------------------|--------------------------|--------------------------|--------------------------|--------------------------|--------------------------|--------------------------|--------------------------|--|
|                                                                                                                 | LDA                      | PBE                      | PBEsol                   | vdW-DF-C09               | Experiment <sup>7</sup>  |                          |                          |                          |                          |                          |  |
| <i>a</i> (Å)                                                                                                    | 3.951                    | 4.068                    | 3.998                    | 3.951                    | 4.000                    |                          |                          |                          |                          |                          |  |
| Atom                                                                                                            | $\Delta x_{\text{atom}}$ | $\Delta z_{\text{atom}}$ | $\Delta x_{\text{atom}}$ | $\Delta z_{\text{atom}}$ | $\Delta x_{\text{atom}}$ | $\Delta z_{\text{atom}}$ | $\Delta x_{\text{atom}}$ | $\Delta z_{\text{atom}}$ | $\Delta x_{\text{atom}}$ | $\Delta z_{\text{atom}}$ |  |
| Ba:<br>1a (0, 0, 0)                                                                                             | ---                      | ---                      | ---                      | ---                      | ---                      | ---                      | ---                      | ---                      | ---                      | ---                      |  |
| Ti:<br>1a (0.5+ $\Delta x_{\text{Ti}}$ , 0.5+ $\Delta x_{\text{Ti}}$ , 0.5+ $\Delta x_{\text{Ti}}$ )            | -0.009                   | -0.009                   | -0.015                   | -0.015                   | -0.012                   | -0.012                   | -0.011                   | -0.011                   | -0.013                   | -0.013                   |  |
| O <sub>I</sub> :<br>3b (0.5+ $\Delta x_{\text{O}_1}$ , 0.5+ $\Delta x_{\text{O}_1}$ , $\Delta z_{\text{O}_1}$ ) | 0.009                    | 0.014                    | 0.016                    | 0.027                    | 0.012                    | 0.019                    | 0.010                    | 0.016                    | 0.011                    | 0.019                    |  |
| <b>KNbO<sub>3</sub>:</b>                                                                                        |                          |                          |                          |                          |                          |                          |                          |                          |                          |                          |  |
|                                                                                                                 | LDA                      | PBE                      | PBEsol                   | vdW-DF-C09               | Experiment <sup>3</sup>  |                          |                          |                          |                          |                          |  |
| <i>a</i> (Å)                                                                                                    | 3.959                    | 4.061                    | 4.002                    | 3.959                    | 4.016                    |                          |                          |                          |                          |                          |  |
| Atom                                                                                                            | $\Delta x_{\text{atom}}$ | $\Delta z_{\text{atom}}$ | $\Delta x_{\text{atom}}$ | $\Delta z_{\text{atom}}$ | $\Delta x_{\text{atom}}$ | $\Delta z_{\text{atom}}$ | $\Delta x_{\text{atom}}$ | $\Delta z_{\text{atom}}$ | $\Delta x_{\text{atom}}$ | $\Delta z_{\text{atom}}$ |  |
| K:<br>1a (0, 0, 0)                                                                                              | ---                      | ---                      | ---                      | ---                      | ---                      | ---                      | ---                      | ---                      | ---                      | ---                      |  |
| Nb:<br>1a (0.5+ $\Delta x_{\text{Nb}}$ , 0.5+ $\Delta x_{\text{Nb}}$ , 0.5+ $\Delta x_{\text{Nb}}$ )            | -0.007                   | -0.007                   | -0.013                   | -0.013                   | -0.011                   | -0.011                   | -0.010                   | -0.010                   | -0.011                   | -0.011                   |  |
| O <sub>I</sub> :<br>3b (0.5+ $\Delta x_{\text{O}_1}$ , 0.5+ $\Delta x_{\text{O}_1}$ , $\Delta z_{\text{O}_1}$ ) | 0.012                    | 0.010                    | 0.017                    | 0.022                    | 0.014                    | 0.016                    | 0.013                    | 0.013                    | 0.018                    | 0.020                    |  |

## References

1. Mabud, S. A. & Glazer, A. M. Lattice parameters and birefringence in PbTiO<sub>3</sub> single crystals. *J. Appl. Crystallogr.* **12**, 49-53 (1979).
2. Hellwege, K. H. & Hellwege, A. M. *Ferroelectrics and Related Substances*. (Springer, 1969).
3. Hewat, A. W. Cubic-tetragonal-orthorhombic-rhombohedral ferroelectric transitions in perovskite potassium niobate: neutron powder profile refinement of the structures. *J. Phys. C: Solid State Phys.* **6**, 2559 (1973).
4. Shirane, G., Pepinsky, R. & Frazer, B. X-ray and neutron diffraction study of ferroelectric PbTiO<sub>3</sub>. *Acta Crystallographica* **9**, 131-140 (1956).
5. Kwei, G. H., Lawson, A. C., Billinge, S. J. L. & Cheong, S. W. Structures of the ferroelectric phases of barium titanate. *J. Phys. Chem.* **97**, 2368-2377 (1993).

6. Shirane, G., Danner, H. & Pepinsky, R. Neutron Diffraction Study of Orthorhombic BaTiO<sub>3</sub>. *Phys. Rev.* **105**, 856 (1957).
7. Hewat, A. W. Structure of rhombohedral ferroelectric barium titanate. *Ferroelectrics* **6**, 215-218 (1973).
